# Supplementary material
Source: PubMed Central journal article supplement (PMC3120091)
Supplement: Supp_Data.pdf [file Supp_Data.pdf]

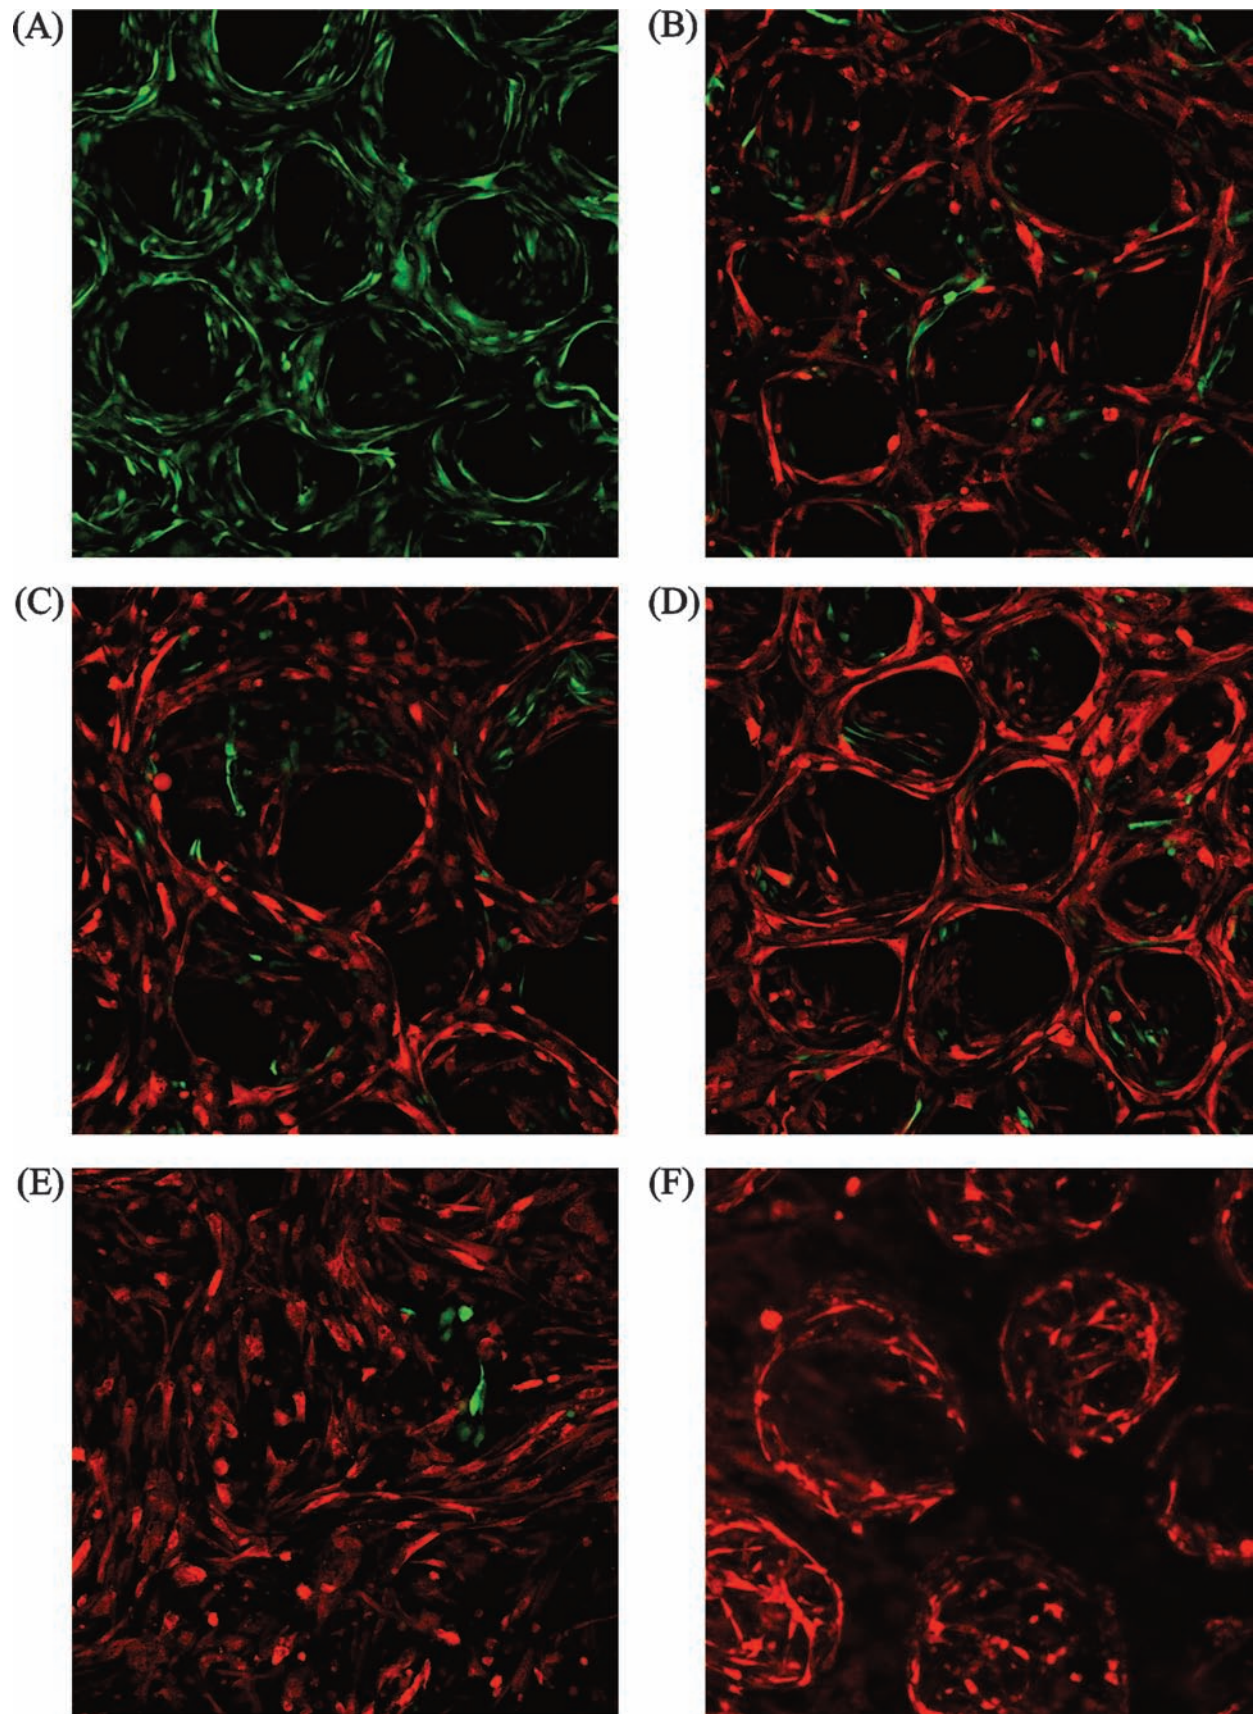

**SUPPLEMENTAL FIG. S1.** Confocal images for pgk-green fluorescent protein-labeled HUVECs co-cultured with mCherry-labeled HuSMCs at different seeding ratios 3 days after seeding. Z-stack images were taken at a magnification of  $10\times$  and reconstructed through a projection mode using LSM510 software. Seeding ratios are (A)  $0.50\times 10^6$  HUVECs, (B)  $0.25\times 10^6$  HUVECs +  $0.25\times 10^6$  HuSMCs, (C)  $0.16\times 10^6$  HUVECs +  $0.34\times 10^6$  HuSMCs, (D)  $0.10\times 10^6$  HUVECs +  $0.40\times 10^6$  HuSMCs, (E)  $0.05\times 10^6$  HUVECs +  $0.45\times 10^6$  HuSMCs, and (F)  $0.50\times 10^6$  HuSMCs, respectively. HUVECs, human umbilical vein endothelial cells; HuSMCs, human smooth muscle cells.

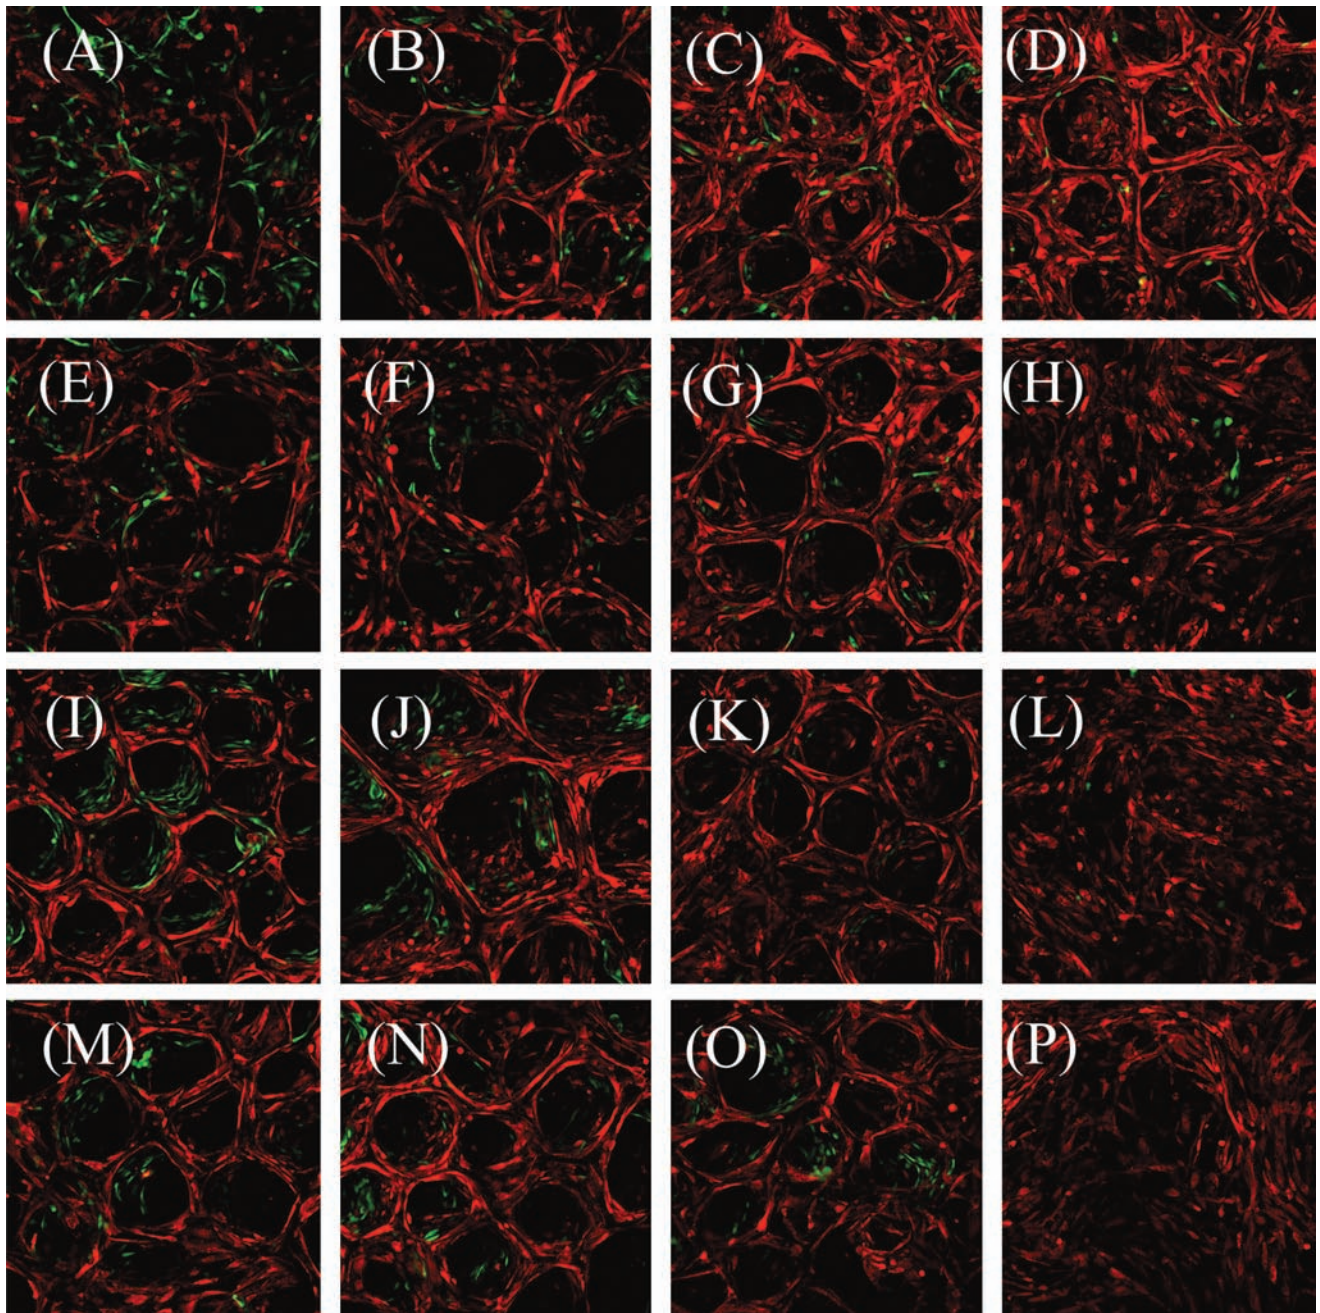

**SUPPLEMENTAL FIG. S2.** Time course of confocal images for pgk-green fluorescent protein-labeled HUVECs co-cultured with mCherry-labeled HuSMCs at different seeding ratios. Z-stack images were taken after (A–D) 2, (E–H) 3, (I–L) 5, and (M–P) 7 days after cell seeding at a magnification of 10 $\times$  and reconstructed through a projection mode using LSM510 software. Seeding ratios are (A, E, I, M)  $0.25 \times 10^6$  HUVECs +  $0.25 \times 10^6$  HuSMCs, (B, F, J, N)  $0.16 \times 10^6$  HUVECs +  $0.34 \times 10^6$  HuSMCs, (C, G, K, O)  $0.10 \times 10^6$  HUVECs +  $0.40 \times 10^6$  HuSMCs, and (D, H, L, P)  $0.05 \times 10^6$  HUVECs +  $0.45 \times 10^6$  HuSMCs, respectively.

**SUPPLEMENTAL MOVIE S1.** Initiation of continuous structures from the E4ORF1 + HUVECs co-cultured with mCherry-labeled HuSMCs seeded onto alginate scaffolds. A 3D rendering of a Z-stack captured of labeled cells at day 3 of seeding onto aligned-pore scaffold.
